# Supplementary material
Source: PubMed Central journal article supplement (PMC3515755)
Supplement: cr2012149x2.pdf [file cr2012149x2.pdf]

## Supplementary information, Table S1

**Table S1** Summary statistics of the exome sequencing data from all the five individuals

| <b>Sample</b> | <b>Total number of reads</b> | <b>Non-duplicated reads</b> | <b>Unique reads</b> | <b>Unique reads overlapping targets</b> | <b>Average depth</b> | <b>% of bases covered by <math>\geq 8\times</math></b> |
|---------------|------------------------------|-----------------------------|---------------------|-----------------------------------------|----------------------|--------------------------------------------------------|
| III:6         | 85,036,326                   | 82,330,594                  | 72,023,420          | 31,538,343                              | 58.77                | 90.18%                                                 |
| II:5          | 71,656,536                   | 69,266,558                  | 61,586,102          | 35,294,824                              | 65.77                | 90.62%                                                 |
| III:4         | 89,366,250                   | 85,976,316                  | 75,521,976          | 43,940,097                              | 81.88                | 91.47%                                                 |
| IV:1          | 76,794,072                   | 74,548,742                  | 66,226,045          | 37,366,255                              | 69.63                | 91.11%                                                 |
| IV:2          | 138,144,520                  | 130,365,202                 | 108,589,044         | 56,288,187                              | 104.89               | 86.25%                                                 |
