# Supplementary material
Source: PubMed Central journal article supplement (PMC3515755)
Supplement: cr2012149x3.pdf [file cr2012149x3.pdf]

## Supplementary information, Table S2

**Table S2** Genetic variants identified through whole-exome sequencing

| <b>Sample</b>                 | <b>Total number of variants</b> | <b>Number of variants in target regions</b> | <b>Number of non-synonymous variants</b> |
|-------------------------------|---------------------------------|---------------------------------------------|------------------------------------------|
| III:6                         | 25561                           | 15561                                       | 6755                                     |
| II:5                          | 23407                           | 14254                                       | 6235                                     |
| III:4                         | 22470                           | 13673                                       | 5939                                     |
| IV:1                          | 22529                           | 13667                                       | 5886                                     |
| IV:2                          | 20754                           | 12780                                       | 5455                                     |
| Case-specific variants        | 771                             | 484                                         | 203                                      |
| Case-specific novel variants* | 3                               | 3                                           | 2                                        |

\* novel variants were defined as mutations that were not detected in the SNP data sets from dbSNP 132 and the 1000 Genome project.
