# Supplementary material
Source: PubMed Central journal article supplement (PMC3515755)
Supplement: cr2012149x6.pdf [file cr2012149x6.pdf]

## Supplementary information, Figure S1

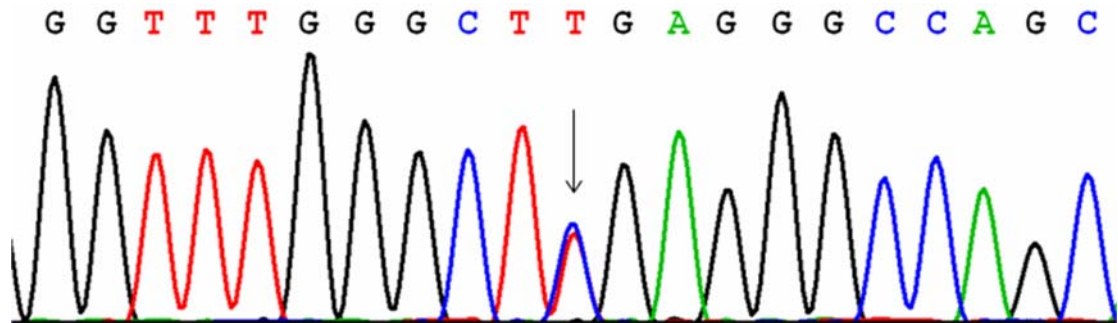

**Figure S1** Chromatogram traces from Sanger sequencing showing the validated missense mutation g.chr7: 99758263C>T.
