# Supplementary material
Source: PubMed Central journal article supplement (PMC3515755)
Supplement: cr2012149x7.pdf [file cr2012149x7.pdf]

## Supplementary information, Figure S2

|            | ****                 | * |
|------------|----------------------|---|
| Human      | QVLPSGAGPRAQTLNPNALI |   |
| Chimpanzee | QVLPSGAGPRAQTLNPNALI |   |
| Rhesus     | QVLPSGAGPRAQTLNPNALI |   |
| Cow        | ---PSGAGPPAHTLDPNALF |   |
| Rat        | HIVPSGASP-----GTLF   |   |
| Mouse      | HIVPSGASP-----GTLF   |   |

**Figure S2** Conservation analysis of the missense mutation g.chr7: 99758263C>T identified in the sporadic PE patient.
